# Supplementary material
Source: PubMed Central journal article supplement (PMC5522897)

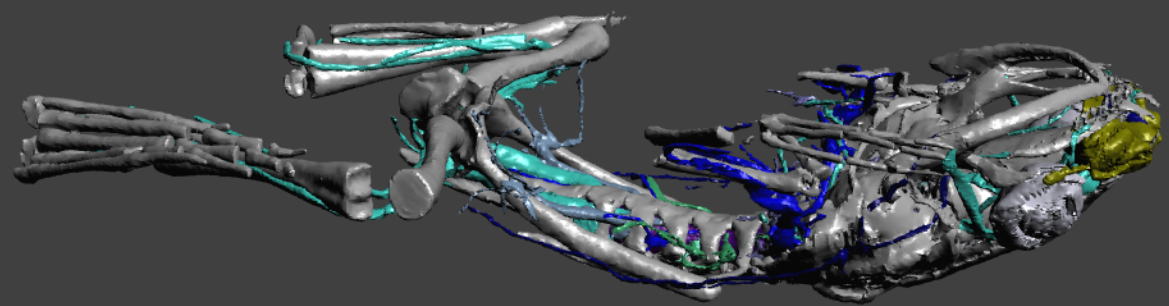

Supplement: JOA-231-169-s003.pdf [file JOA-231-169-s003.pdf]
